1

Version dated: April 27, 2017

2 **So many genes, so little time: comments on**  
3 **divergence-time estimation in the genomic era**

4 STEPHEN A. SMITH<sup>1</sup>, AND JOSEPH W. BROWN<sup>1†</sup>, JOSEPH F. WALKER<sup>1†</sup>

5 <sup>1</sup>*Department of Ecology and Evolutionary Biology, University of Michigan, Ann Arbor, Michigan,*  
6 *48109, USA*

7 <sup>†</sup>*Equal contribution*

8 **Corresponding author:** Stephen A. Smith, Ecology and Evolutionary Biology,  
9 University of Michigan, Ann Arbor, Michigan, 48109, USA; E-mail: eebsmith@umich.edu.

10

## ABSTRACT

- 11 1. Phylogenomic datasets have emerged as an important tool and have been used for  
12 addressing questions involving evolutionary relationships, patterns of genome  
13 structure, signatures of selection, and gene and genome duplications. Here, we  
14 examine these data sources for their utility in the estimation of divergence-times.  
15 Divergence-time estimation can be complicated by the heterogeneity of molecular  
16 rates among lineages and through time. Despite the recent explosion of phylogenomic  
17 data, it is still unclear what the distribution of gene- and lineage-specific rate  
18 heterogeneity is over these genomic and transcriptomic datasets.
- 19 2. Here, we examine rate heterogeneity across genes and determine whether clock-like or  
20 nearly clock-like genes are present in phylogenomic datasets that could be used to  
21 reduce error in divergence-time estimation. We address these questions with six  
22 published phylogenomic datasets including Birds, carnivorous Caryophyllales, broad  
23 Caryophyllales, Millipedes, Hymenoptera, and Vitales. We introduce a simple and  
24 fast method for identifying useful genes for constructing divergence-time estimates

25 and conduct exemplar Bayesian analyses under both clock and uncorrelated  
26 log-normal (UCLN) models.

- 27 3. We used a “gene shopping” approach (implemented in `SortaDate`) to identify genes  
28 with minimal conflict, lower root-to-tip variance, and discernible amounts of  
29 molecular evolution. We find that every empirical dataset examined includes genes  
30 with clock-like, or nearly clock-like, behavior. Many datasets have genes that are not  
31 only clock-like, but also have reasonable evolutionary rates and are mostly  
32 compatible with the species tree. We used these data to conduct basic  
33 divergence-time analyses under strict clock and UCLN models. These exemplar  
34 divergence-time analyses show overlap in age estimates when using either clock or  
35 UCLN models, but with much larger credibility intervals for UCLN models.
- 36 4. We find that “gene shopping” can be productive and successful in finding gene regions  
37 that minimize lineage-specific heterogeneity. By doing relatively simple assessments  
38 of root-to-tip variance and bipartition conflict, we not only explore datasets more  
39 thoroughly but also may estimate ages on phylogenies with lower error. We also  
40 suggest the need to explore more detailed and informative approaches to determine fit  
41 and deviation from a molecular clock, as existing approaches are exceedingly strict.

## 42 *Introduction*

43 Divergence-time estimation is a complicated, but often essential, step for many  
44 phylogenetic analyses. The sources of error include the ambiguous nature of fossil  
45 placement, model mis-specification (e.g., involving significant variation in the branchwise  
46 and/or sitewise rates of evolution), uncertainty in the phylogenetic tree, topological  
47 dissonance amongst gene trees due to incomplete lineage sorting, and complexity of the  
48 model for the molecular clock (e.g., Smith *et al.* 2010; Dornburg *et al.* 2012; Parham *et al.*  
49 2012; Heath and Moore 2014; Beaulieu *et al.* 2015; Kumar and Hedges 2016). While fossils  
50 give the only available information for absolute age, their placement and age carry

51 uncertainty. Multiple fossil calibrations and complicated tree shape priors can interact to  
52 further complicate molecular dating (Zhu *et al.* 2015; Heled and Drummond 2015; Rannala  
53 2016; dos Reis 2016; Brown and Smith 2017). Rate variation is common among individual  
54 branches of a phylogeny and can constitute extensive deviations from the molecular clock.  
55 As a result, complex models have been developed to accommodate for these deviations  
56 (Sanderson 2002; Drummond *et al.* 2006; Drummond and Suchard 2010). However, these  
57 more parameter-rich models also carry with them significant uncertainty and can, when the  
58 data deviate significantly from the model, lead to biased results (e.g., Worobey *et al.* 2014).  
59 Despite these difficulties, researchers continue to use divergence-time estimates extensively  
60 as they remain essential for many downstream evolutionary and comparative analyses.

61 Datasets based on thousands of genes from genomes and transcriptomes have  
62 emerged as a major tool in addressing broad evolutionary questions including, but not  
63 limited to, phylogenetic reconstruction, gene and genome duplication, and inference of  
64 molecular evolutionary patterns and processes. And while these datasets have been used  
65 for divergence-time estimation (e.g., Jarvis *et al.* 2014b; Prum *et al.* 2015), their overall  
66 utility for divergence-time analyses has not been fully examined. In particular, it is unclear  
67 whether within these enormous datasets there exist nearly clock-like gene regions that may  
68 aid in producing lower error divergence-time estimates. While some authors of recent large  
69 genomic analyses, such as Jarvis *et al.* (2014b), have suggested choosing clock-like genes, a  
70 repeatable and fast procedure to identify these genes has not been explored for  
71 phylogenomics and an examination of the frequency of these genes in empirical datasets  
72 has not been conducted.

73 Researchers can take steps to ease sources of errors for divergence-time analyses. For  
74 example, better use of fossils in temporal calibrations can dramatically improve estimations  
75 (e.g., Parham *et al.* 2012; Ksepka *et al.* 2015), as does better accounting for rate variation  
76 in the molecular models by improving model fit. Several relaxed clock models have been  
77 introduced over the last few decades to accommodate rate heterogeneity because most data  
78 do not conform to a strict clock. The most commonly used relaxed clock methods include

79 penalized likelihood (PL, Sanderson 2002) as implemented in `r8s` (Sanderson 2003) (and  
80 more recently in `treePL` (Smith and O’Meara 2012)), and Bayesian uncorrelated rate  
81 models (e.g., the uncorrelated lognormal (UCLN) model; Drummond *et al.* (2006)) as  
82 implemented in `BEAST` (Drummond and Rambaut 2007) and `MrBayes` (Ronquist *et al.*  
83 2012), although many other methods have been developed and new ones are continually  
84 released (e.g., Takezaki *et al.* 1995; Thorne and Kishino 2002; Lartillot and Philippe 2004;  
85 Britton *et al.* 2007; Lepage *et al.* 2007; Rannala and Yang 2007; Drummond and Suchard  
86 2010; Tamura *et al.* 2012; Heath *et al.* 2014; Ronquist *et al.* 2016; Lartillot *et al.* 2016).  
87 The diversity of techniques is matched with a variety of different inputs. For example, PL  
88 implementations minimally require an estimated phylogram, calibration, smoothing  
89 penalty value, and alignment size, while full Bayesian methods minimally require an  
90 alignment and priors to be set for each parameter, including any fossil calibrations.

91 Bayesian methods that use relaxed clock models, such as those implemented in  
92 `BEAST`, `MrBayes`, and `PhyloBayes` (Lartillot and Philippe 2004), simultaneously estimate  
93 phylogenetic relationships and divergence times, and so may be preferred over other  
94 approaches as Bayesian methods incorporate uncertainty more easily and explicitly.  
95 However, the computational burden of these simultaneous reconstruction methods limit  
96 their use to smaller datasets (i.e., excluding entire genomes and transcriptomes).  
97 Fortunately, a prescient solution to this dilemma was proffered two decades ago with the  
98 concept of “gene shopping” (Hedges *et al.* 1996; Kumar and Hedges 1998), wherein  
99 available genes are filtered by how well they conform to a molecular clock. [A related  
100 procedure, “taxon-shopping” (Takezaki *et al.* 1995; van Tuinen and Hedges 2001; van  
101 Tuinen and Dyke 2004), prunes taxa from an alignment until the dataset no longer rejects  
102 a molecular clock test. We do not consider this approach here.]. Using “gene shopping”, it  
103 should be possible to reduce larger datasets to alignments that are capable of being  
104 analyzed by Bayesian methods. However, despite the having been available for decades,  
105 “gene shopping” has not been widely applicable before the recent development of  
106 next-generation sequencing techniques because of the relatively small number of genes

107 available for any single clade (outside of model organisms). However, as genomic and  
108 transcriptomic datasets have become more readily available, “gene shopping” holds  
109 tremendous promise as a tool for inferring phylogenetic timescales. Nevertheless, the utility  
110 of these large genomic datasets for divergence-time estimation and the distribution of  
111 lineage-specific rate heterogeneity has yet to be fully explored.

112       Next generation sequencing techniques have dramatically increased the number of  
113 gene regions available for phylogenetic analysis. This has stimulated research into questions  
114 that are specifically pertinent to datasets with hundreds or thousands of genes. What is  
115 the best method for reconstructing the species tree (e.g., Gatesy and Springer 2014;  
116 Mirarab *et al.* 2014; Roch and Warnow 2015)? How many genes support the dominant  
117 species tree signal (e.g., Salichos *et al.* 2014; Smith *et al.* 2015)? Genomic datasets also  
118 allow us to examine the extent of molecular rate variation in genes, genomes, and lineages.  
119 For example, Yang *et al.* (2015) explored the distribution of lineage-specific rate  
120 heterogeneity throughout transcriptomes of the plant clade Caryophyllales as it relates to  
121 life history. Jarvis *et al.* (2014b), analyzing a genomic dataset of birds, explored rate  
122 heterogeneity and selection as it relates to errors in phylogeny reconstruction in a genomic  
123 dataset of birds. Recently, the clock-likeness of phylogenomic datasets has come of interest  
124 to the community. For example, Doyle *et al.* (2015) attempt to identify strictly clock-like  
125 genes in order to avoid long branch attraction artifacts in phylogenetic inference. Jarvis  
126 *et al.* (2014b) recently filtered gene regions by inferred mean coefficient of rate variation (a  
127 measure of clock-likeness) from full Bayesian analyses of each gene, to identify “clock-like”  
128 genes explicitly for divergence-time estimation. However, while these authors have  
129 conducted filtering analysis on their genomic data, a thorough examination of  
130 lineage-specific rate heterogeneity across clades for divergence-time estimation has not been  
131 conducted. Nevertheless, the availability of full genomes and transcriptomes makes  
132 identifying genes with lower rate variation possible and so are more suitable for  
133 divergence-time estimation.

134       Here we present one means of utilizing genomic data for estimating divergence time

135 by introducing a simple sorting procedure to identify informative (i.e., does not conflict  
136 strongly with an existing species tree hypothesis, and possesses appreciable tree length)  
137 and nearly clock-like (i.e., low variance) genes. Genes that fit these criteria may simplify a  
138 convenient divergence-time estimation for large datasets as methods such as clock  
139 partitioning are difficult when dealing with dozens, hundreds, or even thousands of genes  
140 Duchêne *et al.* (2013). Additionally, this procedure can be used to examine the overall  
141 distribution of evolution, rate heterogeneity, bipartition concordance, and potential utility  
142 of genes for divergence-time analysis. It is assumed that a researcher will possess a  
143 phylogenetic hypothesis of their taxon, inferred (in some manner) from the entire corpus of  
144 available genetic sequences. Thus, the procedure described here is aimed at dating an  
145 existing phylogenetic hypothesis using a subset of the genetic data. The procedure holds  
146 promise that, while various relaxed clock models are available (conducive to  
147 accommodating different forms of rate heterogeneity), data that do not require extensive  
148 rate modelling will enable fast, accurate, and precise divergence time estimates (see also To  
149 *et al.* 2015). Finally, we examine six genomic and transcriptomic datasets across animals  
150 and plants and with different temporal and taxonomic scopes to examine the extent of  
151 lineage-specific rate heterogeneity. We investigate the distribution of variation in the  
152 branchwise rates of evolution across thousands of genes to understand whether these new  
153 genomic resources may improve divergence-time estimation by allowing for simpler models  
154 of molecular evolution.

## 155 *Materials and Methods*

156 *Availability of procedures.*— The analyses performed below can be conducted using the  
157 **SortaDate** package (with source code and instructions available at  
158 <https://github.com/FePhyFoFum/sortadate>). This package is written in Python and  
159 available as an Open Source set of procedures. In some cases, external programs are used  
160 (e.g., those found in the **Phyx** package (Brown *et al.* 2017)) that are also Open Source and  
161 freely available.

162 *Dataset processing.*— We used six published datasets to examine rate heterogeneity: Birds  
163 (BIR, Jarvis *et al.* 2014b), carnivorous Caryophyllales (CAR, Walker *et al.* 2017), the  
164 broader Caryophyllales (CARY, Yang *et al.* 2015), Vitales (VIT, Wen *et al.* 2013),  
165 Hymenoptera (HYM, Johnson *et al.* 2013), and Millipedes (MIL, Brewer and Bond 2013).  
166 The range in datasets spans different taxonomic groups, datasets sizes (e.g., CAR vs  
167 CARY), and age (e.g., from hundreds of millions of years to within the last hundred million  
168 years). Where possible, we used orthologs that were identified using the Maximum  
169 Inclusion method of Yang and Smith (2015). This was the case with every dataset but BIR  
170 for which we used the exon alignments available online (Jarvis *et al.* 2014a;  
171 <http://gigadb.org/dataset/101041>). For each ortholog, we have an estimated gene tree,  
172 based on maximum likelihood (ML) analyses, and alignments, from the original studies.  
173 Gene trees, regardless of the source of orthologs, were then rooted and SH-like tests were  
174 performed to assess confidence in edges (Anisimova and Gascuel 2006). We note that gene  
175 tree rooting is a requirement of the SortaDate procedure. This is typically performed using  
176 outgroups.

177 *Gene tree analyses.*— Because deviation from the clock is empirically manifest in a  
178 phylogram as variation in root-to-tip length among tips within a tree, we measured the  
179 variance of root-to-tip lengths for each tree. This was performed on each rooted ortholog,  
180 for which outgroups were removed, with the `pxlstr` program of `Phyx` package (Brown  
181 *et al.* 2017). We performed the standard clock test for each ortholog (Muse and Weir  
182 1992), with outgroup removed, using `PAUP*` v4.0a151 (Swofford 2001) by calculating the  
183 ML score for a gene both with and without assuming a clock, and then performing a  
184 likelihood ratio test. In addition to assessing the clock-likeness of genes, we also compared  
185 gene tree topologies to the corresponding published species tree topology. Branch lengths  
186 were not available for some species trees. To compare the individual gene trees to their  
187 corresponding species trees, we conducted bipartition comparison analyses on each gene  
188 tree using `pxbp` from the `Phyx` package (procedure described in Smith *et al.* 2015).

189 *Simulations.*— We conducted simulations to examine expectations of rate variation given

190 clock-like, noisy clock-like, and uncorrelated lognormal data. We first generated simulated  
191 clock-like data using `Indelible` v1.03 (Fletcher and Yang 2009) using the WAG model  
192 with 500 characters for amino acid datasets, and JC with 1500 characters for nucleotide  
193 datasets, on each of the empirical species tree topologies. For these data simulations,  
194 because the species tree often had no branch lengths available, node heights were first  
195 simulated randomly using `Indelible` and then the tree was rescaled to a height of 0.25,  
196 0.5, or 0.75. We used the trees generated by `Indelible` to further simulate 100 noisy clock  
197 (rate=1.0, noise=0.25, and rate=1.0, noise=0.75) and uncorrelated lognormal (UCLN)  
198 trees (mean.log=-0.5, stdev.log=0.5, and mean.log=-0.5, stdev.log=1.0) using `NELSI` v0.21  
199 (Ho *et al.* 2015). We note the ‘noise’ in `NELSI` corresponds to the standard deviation of a  
200 normal distribution with mean = 0. For the noisy clock, branch-specific rates are a sum of  
201 the global rate (here, 1.0) and a draw from this normal distribution. The simulations with  
202 noise=0.75 thus are only loosely clock-like, and serve as a comparison between the more  
203 clock-like (noise=0.25) and UCLN analyses. We used `RAxML` v8.2.3 (Stamatakis 2014) to  
204 reconstruct each of these datasets. For each simulation, we examined the rate variation and  
205 the root-to-tip length variation on the reconstructed phylograms.

206 While the focus of this study is not the performance of divergence-time estimation  
207 methods, we still wanted to examine an exemplar from the simulations to ascertain the  
208 variation in the results given different clock models. We used one random realization of  
209 node heights as simulated from the `Indelible` analyses as mentioned above to generate  
210 two datasets with `NELSI`. One dataset had three genes generated from a clock rate of 1 and  
211 noise at 0.25, and the other dataset had three genes generated from a UCLN model and  
212 mean.log at -0.5 and sd.log=1. As above, each amino acid gene consisted of 500 residues,  
213 while DNA genes consisted of 1500 nucleotides. For each simulation, all three genes shared  
214 a common topology (but with different edge lengths, as our filtering procedure involves a  
215 single focal topology). For both the noisy clock-like and UCLN datasets, we conducted  
216 `BEAST` analyses with both a clock model and a UCLN model. A birth-death tree prior was  
217 used as the prior for all node heights, and runs were conducted for 10 million generations



218 with the first 10% discarded as burnin. Results were summarized using `treeannotator`  
219 from the BEAST package. Median node heights as well as 95% HPD node heights were  
220 compared between the simulated datasets and the tree used to generate these datasets.

221 *Sorting and dating analyses on real data.*— In addition to these analyses on simulated  
222 datasets, we conducted divergence-time analyses on a subset of the empirical datasets.  
223 Because these datasets consist of hundreds to thousands of genes, we developed a sorting  
224 procedure intended to mimic that which would be performed as a “gene shopping”  
225 analysis. The sorting procedure relies on the root-to-tip variance statistic, bipartition  
226 calculation to determine the similarity to the species tree, and total treelength. We sorted  
227 first by the similarity to the species tree, then root-to-tip variance, and finally treelength.  
228 For these examples we limited the results to the top three genes reported from the sorting  
229 procedure, although for empirical analyses one should choose the number of genes by  
230 carefully examining the filtering results. Because we filtered for genes that were consistent  
231 with the species tree, these genes were then concatenated and the topology was fixed to be  
232 consistent with the species tree. We applied individual substitution models to each gene  
233 within a data set. However, given that the genes were filtered both to match the species  
234 tree and for clock-likeness, we modelled all genes with a single molecular clock (albeit with  
235 gene-specific relative rates). For each of these datasets, we conducted two BEAST analyses,  
236 one assuming a strict clock and the other assuming a UCLN model. Because specific dates  
237 were not the focus of this examination, the birth-death tree prior was used instead of fossil  
238 priors for nodes. The analyses were run in duplicate for 10 million generations (the BIR  
239 and CARY UCLN analyses took longer to reach convergence, and so was run for 50 million  
240 generations) with the first 10% discarded as burnin. Replicate MCMC logs were  
241 concatenated while removing burnin using the `pxlog` program from the `Phyx` package, and  
242 finally summarized using `treeannotator` as above. Median node heights and 95% HPD  
243 node heights were compared between the clock and UCLN runs as the node heights on the  
244 true phylogeny are unknown.

245

## *Results and Discussion*

246 A fundamental question for each of the empirical datasets is: are there clock-like gene  
247 regions present within the genome? Results were varied, from 0.4% of genes passing the  
248 clock test for the VIT dataset to 17% for the MIL dataset (see Table 1). These results are  
249 not surprising, as even with clock-like genes it is expected that stochastic differences will  
250 accumulate with both increased sampling (i.e., more edges) and older trees (i.e., longer  
251 edges). As for size, the CAR dataset has 7 taxa that are not included in the CARY dataset  
252 but otherwise overlaps partially and has far fewer taxa in total. The CARY dataset, in  
253 addition to being much larger, also contains known shifts in life history (Yang *et al.* 2015).  
254 These differences may account for the variation between these two datasets. As for clade  
255 age, HYM and MIL are significantly older than the other datasets, which may account for  
256 their rate variation. Nevertheless, each dataset indeed had at least a few orthologs that  
257 passed a strict clock test even if these orthologs were in the small minority.

258 Because passing a clock test does not necessarily indicate that the gene would be  
259 good for phylogenetic reconstruction, we also measured treelength and root-to-tip variance  
260 for each ortholog (see Figures 2-3). Clock tests are stringent in their need to conform to  
261 the clock (see below) and so by examining the root-to-tip variation and lineage-specific  
262 variation, we are more directly examining the deviation from ultrametricity. Although this  
263 is primarily descriptive and does not include a formal test, this provides an easily  
264 interpretable characterization of rate variation. We found that the datasets vary  
265 dramatically with no discernible general pattern for both root-to-tip variance and  
266 treelength. For example, the BIR dataset demonstrates very little molecular evolution as  
267 demonstrated by the short treelengths. For this dataset, we analyzed nucleotides (rather  
268 than amino acids) to maximize treelengths as Jarvis *et al.* (2014b) demonstrated low rates  
269 of evolution, especially deep in the phylogeny. However, the inferred rates of evolution (as  
270 determined by overall tree length) were still low. Given the difficulty in resolving the avian  
271 phylogeny, this pattern is perhaps to be expected (Jarvis *et al.* 2014b). This same pattern  
272 is present in the VIT dataset, though this was not explored as thoroughly in the original

273 publication. Both the CAR and CARY datasets show a pattern of increasing variance with  
274 greater treelength (Figures 2). This contrasts with the HYM and MIL datasets that are  
275 clock-like even with longer treelengths (Figure 3). Lineage-specific rate variation in each  
276 dataset was idiosyncratic with most extreme variation in the outgroups. While outgroups  
277 were excluded for clock tests and in determining root-to-tip variance for “gene shopping”,  
278 we allowed outgroups to remain for lineage-specific rate variation analyses as in the right  
279 handed plots of Figure 3. The VIT dataset was an exception with several lineages other  
280 than the outgroup having high rates. In each dataset, there were genes that fell within the  
281 distribution of simulated trees that are clock-like or clock-like with low noise.

282 One potential benefit of identifying orthologs with lower lineage-specific rate  
283 variation within phylogenomic datasets is to use these, or a subset of these, orthologs to  
284 conduct divergence-time analyses. The hope is that by using clock-like genes, we may  
285 overcome or lessen the impact of lineage-specific rate variation on the error of divergence  
286 time analyses. The non-identifiability of rates and dates (e.g., longer branch lengths may  
287 be the result of a long time or fast evolution) is exacerbated by lineage-specific rate  
288 heterogeneity. We used a subset of orthologs to conduct divergence time analyses and we  
289 implemented a sorting procedure (packed in `SortaDate`) to (i) filter the genes that best  
290 reflect the species tree (i.e., higher bipartition concordance with the species tree), (ii) have  
291 lower root-to-tip variance (i.e., most clock-like), and discernible amounts of molecular  
292 evolution (i.e., greater tree length; Figure 1). For each empirical dataset, we generated  
293 such an alignment (see Table 2). The genes that were filtered and used for divergence-time  
294 analyses for the BIR, CARY, VIT, and HYM datasets rejected the clock. The genes for the  
295 CAR and MIL datasets either didn’t or weakly rejected the clock. Resulting HPD trees  
296 were rescaled so that the root heights were equivalent to allow for easier comparisons  
297 between datasets. Typically, fossil placements would be used for scaling but because these  
298 are not intended to be runs for future use, we eliminated fossil placements as one source of  
299 variation. We found rough correspondence of node heights between the clock and UCLN  
300 analyses, especially for the four smallest datasets (see Figure 4). The UCLN analyses, as

301 expected, had far greater variance in the 95% HPDs for node ages. We found the greatest  
302 differences in the larger BIR and CARY datasets (see Table 3) where there are major  
303 differences in tree heights. This may reflect the size of the dataset or the underlying rate  
304 variation in the datasets. In general, strict clock estimates resulted in younger median node  
305 ages than analogous UCLN estimates, as well as younger maximum and older minimum  
306 95% HPD values (see Table 3). The coefficient of rate variation statistics (an measure of  
307 clock-likeness) for UCLN runs ranged from the lowest mean values of 0.2358  
308 (stErr=0.0347) in HYM to the highest of 1.2464 (stErr=0.1135) in CARY.

309         As is always the problem with real datasets, the true divergence-times are unknown.  
310 So we conducted exemplar analyses. For each empirical dataset, we simulated data for  
311 three genes under both noisy clock and UCLN models to examine the variation in the  
312 resulting divergence-time analyses where the true dates were known. For these simulated  
313 datasets, a strict clock was rejected in each case, including those datasets that were  
314 simulated under a clock with noise. We compared the resulting node heights from the  
315 divergence time analyses under clock and UCLN models with the tree used for simulation  
316 (see Tables 4-5 and Figure 5). For the datasets generated under a noisy clock model, more  
317 of the true node heights were found in the 95% HPD interval when using the UCLN model  
318 for inference than the strict clock model for inference. However, the precision as measured  
319 by the total width of the 95% HPD interval for the UCLN runs were much lower than the  
320 clock runs (see Tables 4-5). Those nodes that were not within the interval of the 95% HPD  
321 when using the strict clock model for reconstruction, were close to the true value. So, while  
322 fewer true node ages were contained in the strict clock HPDs, the overall error rate was  
323 lower. For example, in the CARY dataset, while fewer nodes in the clock estimate were  
324 found to be within the interval (52 vs 67 for the UCLN), the distance of the interval from  
325 the estimate was lower for the clock dataset for both the high and low value for the 95%  
326 HPD. Stated another way, the UCLN intervals were large enough that the true age was  
327 often included, but this was at the cost of far lower precision. Because of this error relative  
328 to the strict clock, the UCLN perhaps should not be the preferred model, especially if the



355

### *Data availability*

356 All unpublished analyses and datasets are available through Data Dryad (#XXXXXX).

357 Associated scripts related to the method are available on GitHub at

358 <https://github.com/FePhyFoFum/sortadate>.

359

### *Author contributions*

360 SAS, JWB, and JFW conceived of the project. SAS, JFW, and JWB analyzed the data.

361 SAS, JWB, and JFW wrote the manuscript.

\*

362

363 References

364 Anisimova, M. and Gascuel, O. 2006. Approximate likelihood-ratio test for branches: A  
365 fast, accurate, and powerful alternative. *Systematic Biology*, 55(4): 539–552.

366 Beaulieu, J. M., O’Meara, B. C., Crane, P., and Donoghue, M. J. 2015. Heterogeneous  
367 rates of molecular evolution and diversification could explain the triassic age estimate for  
368 angiosperms. *Systematic Biology*, 64(5): 869–878.

369 Brewer, M. S. and Bond, J. E. 2013. Ordinal-level phylogenomics of the arthropod class  
370 diplopoda (millipedes) based on an analysis of 221 nuclear protein-coding loci generated  
371 using next-generation sequence analyses. *PLoS ONE*, 8(11): e79935.

372 Britton, T., Anderson, C. L., Jacquet, D., Lundqvist, S., and Bremer, K. 2007. Estimating  
373 divergence times in large phylogenetic trees. *Systematic Biology*, 56(5): 741–752.

374 Brown, J. W. and Smith, S. A. 2017. The past sure is tense: On interpreting phylogenetic  
375 divergence time estimates. *bioRxiv*, 113720.

376 Brown, J. W., Walker, J. F., and Smith, S. A. 2017. phyx: Phylogenetic tools for Unix.  
377 *Bioinformatics*. doi: 10.1093/bioinformatics/btx063.

378 Dornburg, A., Brandley, M. C., McGowen, M. R., and Near, T. J. 2012. Relaxed clocks  
379 and inferences of heterogeneous patterns of nucleotide substitution and divergence time  
380 estimates across whales and dolphins (mammalia: Cetacea). *Molecular Biology and  
381 Evolution*, 29(2): 721–736.

382 dos Reis, M. 2016. Notes on the birth–death prior with fossil calibrations for Bayesian  
383 estimation of species divergence times. *Philosophical Transactions of the Royal Society of  
384 London B: Biological Sciences*, 371(1699): 20150128.

- 385 Doyle, V. P., Young, R. E., Naylor, G. J., and Brown, J. M. 2015. Can we identify genes  
386 with increased phylogenetic reliability? *Systematic Biology*, 64(5): 824–837.
- 387 Drummond, A. J. and Rambaut, A. 2007. BEAST: Bayesian evolutionary analysis by  
388 sampling trees. *BMC Evolutionary Biology*, 7(1): 214.
- 389 Drummond, A. J. and Suchard, M. A. 2010. Bayesian random local clocks, or one rate to  
390 rule them all. *BMC Biology*, 8(1): 114.
- 391 Drummond, A. J., Ho, S. Y., Phillips, M. J., Rambaut, A., *et al.* 2006. Relaxed  
392 phylogenetics and dating with confidence. *PLoS Biology*, 4(5): 699.
- 393 Duchêne, S., Molak, M., and Ho, S. Y. 2013. Clockstar: choosing the number of  
394 relaxed-clock models in molecular phylogenetic analysis. *Bioinformatics*, page btt665.
- 395 Fletcher, W. and Yang, Z. 2009. INDELible: a flexible simulator of biological sequence  
396 evolution. *Molecular Biology and Evolution*, 26(8): 1879–1888.
- 397 Gatesy, J. and Springer, M. S. 2014. Phylogenetic analysis at deep timescales: Unreliable  
398 gene trees, bypassed hidden support, and the coalescence/concatalescence conundrum.  
399 *Molecular Phylogenetics and Evolution*, 80: 231–266.
- 400 Heath, T. A. and Moore, B. R. 2014. Bayesian inference of species divergence times. In  
401 M.-H. Chen, L. Kuo, and P. O. Lewis, editors, *Bayesian Phylogenetics: Methods*  
402 *Algorithms, and Applications*, chapter 13, pages 277–318. CRC Press, Boca Raton,  
403 Florida.
- 404 Heath, T. A., Huelsenbeck, J. P., and Stadler, T. 2014. The fossilized birth–death process  
405 for coherent calibration of divergence-time estimates. *Proceedings of the National*  
406 *Academy of Sciences*, 111(29): E2957–E2966.
- 407 Hedges, S. B., Parker, P. H., Sibley, C. G., and Kumar, S. 1996. Continental breakup and  
408 the ordinal diversification of birds and mammals. *Nature*, 381(6579): 226–229.



- 409 Heled, J. and Drummond, A. J. 2015. Calibrated birth–death phylogenetic time-tree priors  
410 for Bayesian inference. *Systematic Biology*, 64(3): 369–383.
- 411 Ho, S. Y. W., Duchêne, S., and Duchêne, D. 2015. Simulating and detecting  
412 autocorrelation of molecular evolutionary rates among lineages. *Molecular Ecology*  
413 *Resources*, 15(4): 688–696.
- 414 Jarvis, E., Mirarab, S., Aberer, A., Houde, P., Li, C., Ho, S., Faircloth, B., Nabholz, B.,  
415 Howard, J., Suh, A., Weber, C., Fonseca, R., Alfaro-Nunez, A., Narula, N., Liu, L., Burt,  
416 D., Ellegren, H., Edwards, S., Stamatakis, A., Mindell, D., Cracraft, J., Braun, E.,  
417 Warnow, T., Jun, W., Gilbert, M., and Zhang, G. 2014a. Phylogenomic analyses data of  
418 the avian phylogenomics project. *GigaScience*, 4(1): 4.
- 419 Jarvis, E. D., Mirarab, S., Aberer, A. J., Li, B., Houde, P., Li, C., Ho, S. Y. W., Faircloth,  
420 B. C., Nabholz, B., Howard, J. T., Suh, A., Weber, C. C., da Fonseca, R. R., Li, J.,  
421 Zhang, F., Li, H., Zhou, L., Narula, N., Liu, L., Ganapathy, G., Boussau, B., Bayzid,  
422 M. S., Zavidovych, V., Subramanian, S., Gabaldón, T., Capella-Gutiérrez, S.,  
423 Huerta-Cepas, J., Rekepalli, B., Munch, K., Schierup, M., Lindow, B., Warren, W. C.,  
424 Ray, D., Green, R. E., Bruford, M. W., Zhan, X., Dixon, A., Li, S., Li, N., Huang, Y.,  
425 Derryberry, E. P., Bertelsen, M. F., Sheldon, F. H., Brumfield, R. T., Mello, C. V.,  
426 Lovell, P. V., Wirthlin, M., Schneider, M. P. C., Prosdocimi, F., Samaniego, J. A.,  
427 Velazquez, A. M. V., Alfaro-Núñez, A., Campos, P. F., Petersen, B., Sicheritz-Ponten,  
428 T., Pas, A., Bailey, T., Scofield, P., Bunce, M., Lambert, D. M., Zhou, Q., Perelman, P.,  
429 Driskell, A. C., Shapiro, B., Xiong, Z., Zeng, Y., Liu, S., Li, Z., Liu, B., Wu, K., Xiao, J.,  
430 Yinqi, X., Zheng, Q., Zhang, Y., Yang, H., Wang, J., Smeds, L., Rheindt, F. E., Braun,  
431 M., Fjeldsa, J., Orlando, L., Barker, F. K., Jønsson, K. A., Johnson, W., Koepfli, K.-P.,  
432 O’Brien, S., Haussler, D., Ryder, O. A., Rahbek, C., Willerslev, E., Graves, G. R.,  
433 Glenn, T. C., McCormack, J., Burt, D., Ellegren, H., Alström, P., Edwards, S. V.,  
434 Stamatakis, A., Mindell, D. P., Cracraft, J., Braun, E. L., Warnow, T., Jun, W., Gilbert,

- 435 M. T. P., and Zhang, G. 2014b. Whole-genome analyses resolve early branches in the  
436 tree of life of modern birds. *Science*, 346(6215): 1320–1331.
- 437 Johnson, B. R., Borowiec, M. L., Chiu, J. C., Lee, E. K., Atallah, J., and Ward, P. S. 2013.  
438 Phylogenomics resolves evolutionary relationships among ants, bees, and wasps. *Current*  
439 *Biology*, 23(20): 2058–2062.
- 440 Ksepka, D. T., Parham, J. F., Allman, J. F., Benton, M. J., Carrano, M. T., Cranston,  
441 K. A., Donoghue, P. C. J., Head, J. J., Hermsen, E. J., Irmis, R. B., Joyce, W. G., Kohli,  
442 M., Lamm, K. D., Leehr, D., Patané, J. L., Polly, P. D., Phillips, M. J., Smith, N. A.,  
443 Smith, N. D., Van Tuinen, M., Ware, J. L., and Warnock, R. C. M. 2015. The fossil  
444 calibration database—a new resource for divergence dating. *Systematic Biology*, 64(5):  
445 853–859.
- 446 Kumar, S. and Hedges, S. B. 1998. A molecular timescale for vertebrate evolution. *Nature*,  
447 392(6679): 917–920.
- 448 Kumar, S. and Hedges, S. B. 2016. Advances in time estimation methods for molecular  
449 data. *Molecular Biology and Evolution*, 33(4): 863–869.
- 450 Lartillot, N. and Philippe, H. 2004. A Bayesian mixture model for across-site  
451 heterogeneities in the amino-acid replacement process. *Molecular Biology and Evolution*,  
452 21(6): 1095–1109.
- 453 Lartillot, N., Phillips, M. J., and Ronquist, F. 2016. A mixed relaxed clock model.  
454 *Philosophical Transactions of the Royal Society of London B: Biological Sciences*,  
455 371(1699).
- 456 Lepage, T., Bryant, D., Philippe, H., and Lartillot, N. 2007. A general comparison of  
457 relaxed molecular clock models. *Molecular Biology and Evolution*, 24(12): 2669–2680.
- 458 Mirarab, S., Bayzid, M. S., Boussau, B., and Warnow, T. 2014. Statistical binning enables  
459 an accurate coalescent-based estimation of the avian tree. *Science*, 346(6215): 1250463.

- 460 Muse, S. and Weir, B. S. 1992. Testing for equality of evolutionary rates. *Genetics*, 132(1):  
461 269–276.
- 462 Parham, J. F., Donoghue, P. C. J., Bell, C. J., Calway, T. D., Head, J. J., Holroyd, P. A.,  
463 Inoue, J. G., Irmis, R. B., Joyce, W. G., Ksepka, D. T., Patané, J. S. L., Smith, N. D.,  
464 Tarver, J. E., van Tuinen, M., Yang, Z., Angielczyk, K. D., Greenwood, J. M., Hipsley,  
465 C. A., Jacobs, L., Makovicky, P. J., Müller, J., Smith, K. T., Theodor, J. M., Warnock,  
466 R. C. M., and Benton, M. J. 2012. Best practices for justifying fossil calibrations.  
467 *Systematic Biology*, 61(2): 346–359.
- 468 Prum, R. O., Berv, J. S., Dornburg, A., Field, D. J., Townsend, J. P., Lemmon, E. M., and  
469 Lemmon, A. R. 2015. A comprehensive phylogeny of birds (Aves) using targeted  
470 next-generation DNA sequencing. *Nature*, 526(7574): 569–573.
- 471 Rannala, B. 2016. Conceptual issues in Bayesian divergence time estimation. *Philosophical*  
472 *Transactions of the Royal Society of London B: Biological Sciences*, 371(1699): 20150134.
- 473 Rannala, B. and Yang, Z. 2007. Inferring speciation times under an episodic molecular  
474 clock. *Systematic Biology*, 56(3): 453–466.
- 475 Roch, S. and Warnow, T. 2015. On the robustness to gene tree estimation error (or lack  
476 thereof) of coalescent-based species tree methods. *Systematic Biology*, 64(4): 663–676.
- 477 Ronquist, F., Teslenko, M., Van Der Mark, P., Ayres, D. L., Darling, A., Höhna, S.,  
478 Larget, B., Liu, L., Suchard, M. A., and Huelsenbeck, J. P. 2012. MrBayes 3.2: efficient  
479 Bayesian phylogenetic inference and model choice across a large model space. *Systematic*  
480 *Biology*, 61(3): 539–542.
- 481 Ronquist, F., Lartillot, N., and Phillips, M. J. 2016. Closing the gap between rocks and  
482 clocks using total-evidence dating. *Philosophical Transactions of the Royal Society of*  
483 *London B: Biological Sciences*, 371(1699): 20150136.

- 484 Salichos, L., Stamatakis, A., and Rokas, A. 2014. Novel information theory-based measures  
485 for quantifying incongruence among phylogenetic trees. *Molecular Biology and*  
486 *Evolution*, 31(5): 1261–1271.
- 487 Sanderson, M. J. 2002. Estimating absolute rates of molecular evolution and divergence  
488 times: a penalized likelihood approach. *Molecular Biology and Evolution*, 19(1): 101–109.
- 489 Sanderson, M. J. 2003. r8s: inferring absolute rates of molecular evolution and divergence  
490 times in the absence of a molecular clock. *Bioinformatics*, 19(2): 301–302.
- 491 Smith, S. A. and O’Meara, B. C. 2012. treePL: divergence time estimation using penalized  
492 likelihood for large phylogenies. *Bioinformatics*, 28(20): 2689–2690.
- 493 Smith, S. A., Beaulieu, J. M., and Donoghue, M. J. 2010. An uncorrelated relaxed-clock  
494 analysis suggests an earlier origin for flowering plants. *Proceedings of the National*  
495 *Academy of Sciences*, 107(13): 5897–5902.
- 496 Smith, S. A., Moore, M. J., Brown, J. W., and Yang, Y. 2015. Analysis of phylogenomic  
497 datasets reveals conflict, concordance, and gene duplications with examples from animals  
498 and plants. *BMC Evolutionary Biology*, 15(1): 150.
- 499 Stamatakis, A. 2014. RAxML version 8: a tool for phylogenetic analysis and post-analysis  
500 of large phylogenies. *Bioinformatics*, 30(9): 1312–1313.
- 501 Swofford, D. L. 2001. PAUP\*: Phylogenetic Analysis Using Parsimony (\* and other  
502 methods) 4.0.b5.
- 503 Takezaki, N., Rzhetsky, A., and Nei, M. 1995. Phylogenetic test of the molecular clock and  
504 linearized trees. *Molecular Biology and Evolution*, 12(5): 823–833.
- 505 Tamura, K., Battistuzzi, F. U., Billig-Ross, P., Murillo, O., Filipowski, A., and Kumar, S.  
506 2012. Estimating divergence times in large molecular phylogenies. *Proceedings of the*  
507 *National Academy of Sciences*, 109(47): 19333–19338.

- 508 Thorne, J. L. and Kishino, H. 2002. Divergence time and evolutionary rate estimation with  
509 multilocus data. *Systematic Biology*, 51(5): 689–702.
- 510 To, T.-H., Jung, M., Lycett, S., and Gascuel, O. 2015. Fast dating using least-squares  
511 criteria and algorithms. *Systematic Biology*, 65(1): 82–97.
- 512 van Tuinen, M. and Dyke, G. J. 2004. Calibration of galliform molecular clocks using  
513 multiple fossils and genetic partitions. *Molecular Phylogenetics and Evolution*, 30(1):  
514 74–86.
- 515 van Tuinen, M. and Hedges, S. B. 2001. Calibration of avian molecular clocks. *Molecular  
516 Biology and Evolution*, 18(2): 206–213.
- 517 Walker, J. F., Yang, Y., Moore, M. J., Mikenas, J., Brockington, S. F., Timoneda, A., and  
518 Smith, S. A. 2017. Widespread paleopolyploidy, gene tree conflict and recalcitrant  
519 relationships among the carnivorous caryophyllales. *bioRxiv*, 115741.
- 520 Wen, J., Xiong, Z., Nie, Z.-L., Mao, L., Zhu, Y., Kan, X.-Z., Ickert-Bond, S. M., Gerrath,  
521 J., Zimmer, E. A., and Fang, X.-D. 2013. Transcriptome sequences resolve deep  
522 relationships of the grape family. *PLoS ONE*, 8(9): e74394.
- 523 Worobey, M., Han, G.-Z., and Rambaut, A. 2014. A synchronized global sweep of the  
524 internal genes of modern avian influenza virus. *Nature*, 508(7495): 254–257.
- 525 Yang, Y., Moore, M. J., Brockington, S. F., Soltis, D. E., Wong, G. K.-S., Carpenter, E. J.,  
526 Zhang, Y., Chen, L., Yan, Z., Xie, Y., Sage, R. F., Covshoff, S., Hibberd, J. M., Nelson,  
527 M. N., and Smith, S. A. 2015. Dissecting molecular evolution in the highly diverse plant  
528 clade caryophyllales using transcriptome sequencing. *Molecular Biology and Evolution*,  
529 32(8): 2001–2014.
- 530 Zhu, T., Dos Reis, M., and Yang, Z. 2015. Characterization of the uncertainty of  
531 divergence time estimation under relaxed molecular clock models using multiple loci.  
532 *Systematic Biology*, 64(2): 267–280.

*Tables*

| Dataset | Orthologs | Clocklike (%) |
|---------|-----------|---------------|
| BIR     | 7116      | 440 (6.18)    |
| CAR     | 3767      | 274 (7.27)    |
| CARY    | 583       | 3 (0.51)      |
| HYM     | 1161      | 22 (1.89)     |
| MIL     | 152       | 26 (17.10)    |
| VIT     | 2267      | 8 (0.35)      |

Table 1: Dataset size and results of likelihood ratio tests for strict clock-like gene behavior.

| Gene name             | Variance    | Tree length | Bipartition proportion |
|-----------------------|-------------|-------------|------------------------|
| <b>BIR</b>            |             |             |                        |
| 12969                 | 0.000791644 | 2.73068     | 0.5                    |
| 1173                  | 0.00205589  | 3.01712     | 0.457                  |
| 12123                 | 8.32228e-05 | 0.825943    | 0.413                  |
| <b>CAR</b>            |             |             |                        |
| cluster259MIortho7    | 9.07832e-05 | 0.346618    | 1.0                    |
| cluster3790MIortho1   | 0.000245644 | 0.739886    | 1.0                    |
| cluster234MIortho1    | 0.0004849   | 1.19575     | 1.0                    |
| <b>CARY</b>           |             |             |                        |
| cc7674-1-1to1ortho    | 0.0183029   | 10.9821     | 0.701                  |
| cc4427-1MIortho1      | 0.0093838   | 8.7827      | 0.657                  |
| cc7873-1MIortho1      | 0.0206222   | 10.4773     | 0.657                  |
| <b>HYM</b>            |             |             |                        |
| cluster3024-1-1ortho1 | 0.00159156  | 2.64137     | 0.706                  |
| cluster5160-1-1ortho1 | 0.00294197  | 2.0815      | 0.706                  |
| cluster1251-1-1ortho1 | 0.00621115  | 4.99913     | 0.706                  |
| <b>MIL</b>            |             |             |                        |
| cluster89-1-1ortho1   | 0.00200945  | 0.909593    | 0.875                  |
| cluster1437-1-1ortho1 | 0.00872612  | 2.96511     | 0.875                  |
| cluster1615-1-1ortho1 | 0.010942    | 3.56434     | 0.875                  |
| <b>VIT</b>            |             |             |                        |
| cluster9579-1MIortho1 | 0.000978163 | 0.519373    | 1.0                    |
| cluster1236-1MIortho1 | 0.00106778  | 0.547562    | 1.0                    |
| cluster461-1MIortho1  | 0.001227    | 0.607536    | 1.0                    |

Table 2: Properties of the genes used in the empirical dating analyses. Variance regards the root-to-tip paths. Tree length is measured in units of expected substitutions per site across all branches. Bipartition proportion measures agreement to the species tree topology (1.0 indicates complete concordance).

| Dataset     | Height | Lower | Higher |
|-------------|--------|-------|--------|
| <b>BIR</b>  | -0.26  | 0.27  | -1.49  |
| <b>CAR</b>  | -0.004 | 0.04  | -0.2   |
| <b>CARY</b> | -3.93  | 0.52  | -8.56  |
| <b>HYM</b>  | -0.12  | 0.1   | -0.63  |
| <b>MIL</b>  | -0.09  | 0.04  | -1.12  |
| <b>VIT</b>  | -0.02  | 0.08  | -0.56  |

Table 3: The cumulative difference in the height, lower 95% HPD, and higher 95% HPD of each node comparing the UCLN estimates to the clock estimates from the individual empirical dating analyses. A value lower than 0 results when the cumulative difference in the clock values of height or HPD are younger than the associated UCLN values.

| Dataset     | Height |      | Lower |      | Higher |      | Nodes |    | Error |      |
|-------------|--------|------|-------|------|--------|------|-------|----|-------|------|
|             | CL     | UC   | CL    | UC   | CL     | UC   | CL    | UC | CL    | UC   |
| <b>BIR</b>  | 0.63   | 0.5  | 0.48  | 0.69 | 0.96   | 1.33 | 16    | 39 | 1.44  | 2.02 |
| <b>CAR</b>  | 0.26   | 0.2  | 0.37  | 0.85 | 0.25   | 0.63 | 5     | 12 | 0.62  | 1.49 |
| <b>CARY</b> | 0.54   | 0.63 | 1.23  | 2.12 | 0.64   | 1.11 | 52    | 67 | 1.88  | 3.24 |
| <b>HYM</b>  | 0.16   | 0.76 | 0.21  | 0.65 | 0.38   | 0.94 | 15    | 3  | 0.58  | 1.59 |
| <b>MIL</b>  | 0.17   | 0.42 | 0.12  | 0.45 | 0.33   | 0.46 | 5     | 3  | 0.44  | 0.91 |
| <b>VIT</b>  | 0.27   | 0.26 | 0.42  | 0.32 | 0.2    | 0.27 | 5     | 8  | 0.62  | 0.59 |

Table 4: Assessment of dating error for the clock (CL) and UCLN (UC) analyses of the simulated *clock* data. All measures involve distance from the true node age, and are cumulative sums across all nodes. Height is the inferred node age. Lower and Higher regard the 95% HPD node age bounds. Nodes indicates the number of true node ages contained within the HPD interval. Error is the total error involved, equivalent to Low + High.

| Dataset     | Height |      | Lower |      | Higher |      | Nodes |    | Error |       |
|-------------|--------|------|-------|------|--------|------|-------|----|-------|-------|
|             | CL     | UC   | CL    | UC   | CL     | UC   | CL    | UC | CL    | UC    |
| <b>BIR</b>  | 1.26   | 3.21 | 1.26  | 6.43 | 1.37   | 1.52 | 12    | 24 | 2.64  | 7.95  |
| <b>CAR</b>  | 0.76   | 0.69 | 0.89  | 1.59 | 0.68   | 0.58 | 2     | 9  | 1.57  | 2.17  |
| <b>CARY</b> | 2.29   | 3.51 | 2.37  | 8.98 | 2.38   | 4.97 | 15    | 55 | 4.75  | 13.95 |
| <b>HYM</b>  | 0.14   | 0.91 | 0.61  | 3.01 | 0.61   | 1.58 | 18    | 16 | 1.22  | 4.65  |
| <b>MIL</b>  | 0.14   | 0.61 | 0.32  | 1.6  | 0.57   | 1.17 | 11    | 10 | 0.89  | 2.77  |
| <b>VIT</b>  | 0.29   | 1.12 | 0.82  | 2.43 | 0.29   | 0.73 | 14    | 9  | 1.11  | 3.16  |

Table 5: Assessment of dating error for the clock (CL) and UCLN (UC) analyses of the simulated *ucln* data. All measures involve distance from the true node age, and are cumulative sums across all nodes. Height is the inferred node age. Lower and Higher regard the 95% HPD node age bounds. Nodes indicates the number of true node ages contained within the HPD interval. Error is the total error involved, equivalent to Low + High.



534

## Figures and Figure captions

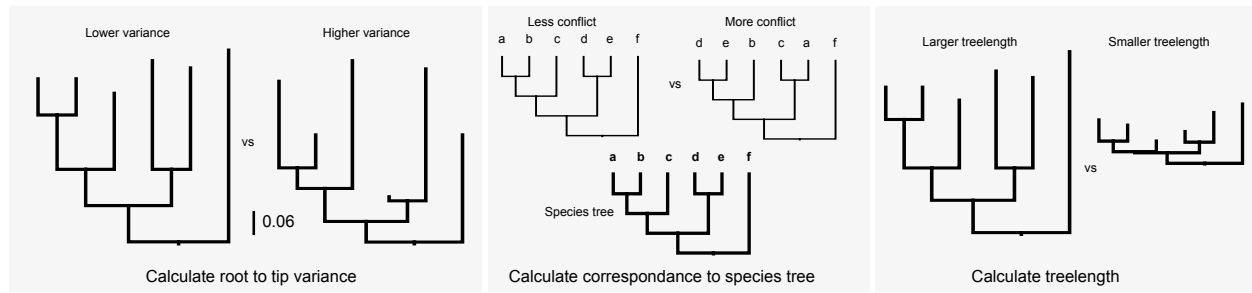

Figure 1: Measures used for sorting genes for use in dating analyses. The order presented here is arbitrary.

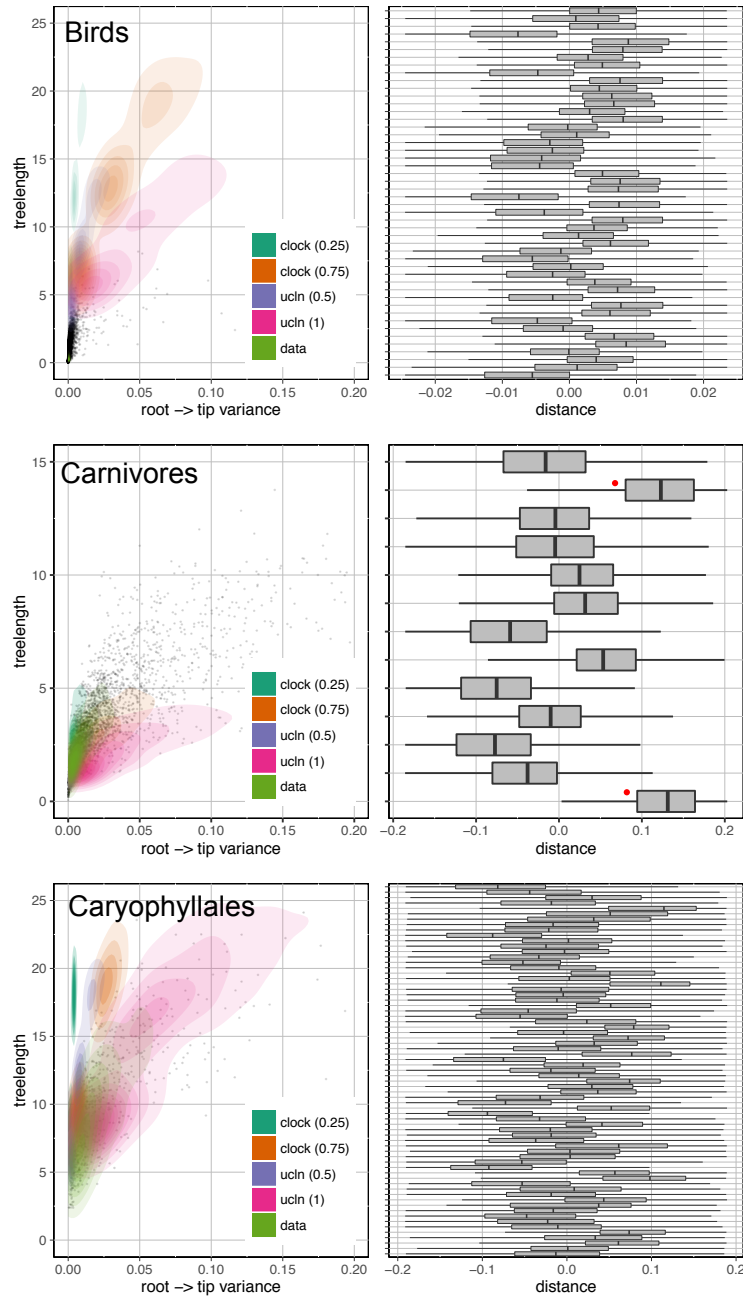

Figure 2: Plots of gene tree properties (left, including root-to-tip variance and treelength for simulated and empirical datasets) and tip-specific root-to-tip variance for empirical datasets (right). When the outgroup is present, the taxa are labeled with a red dot.

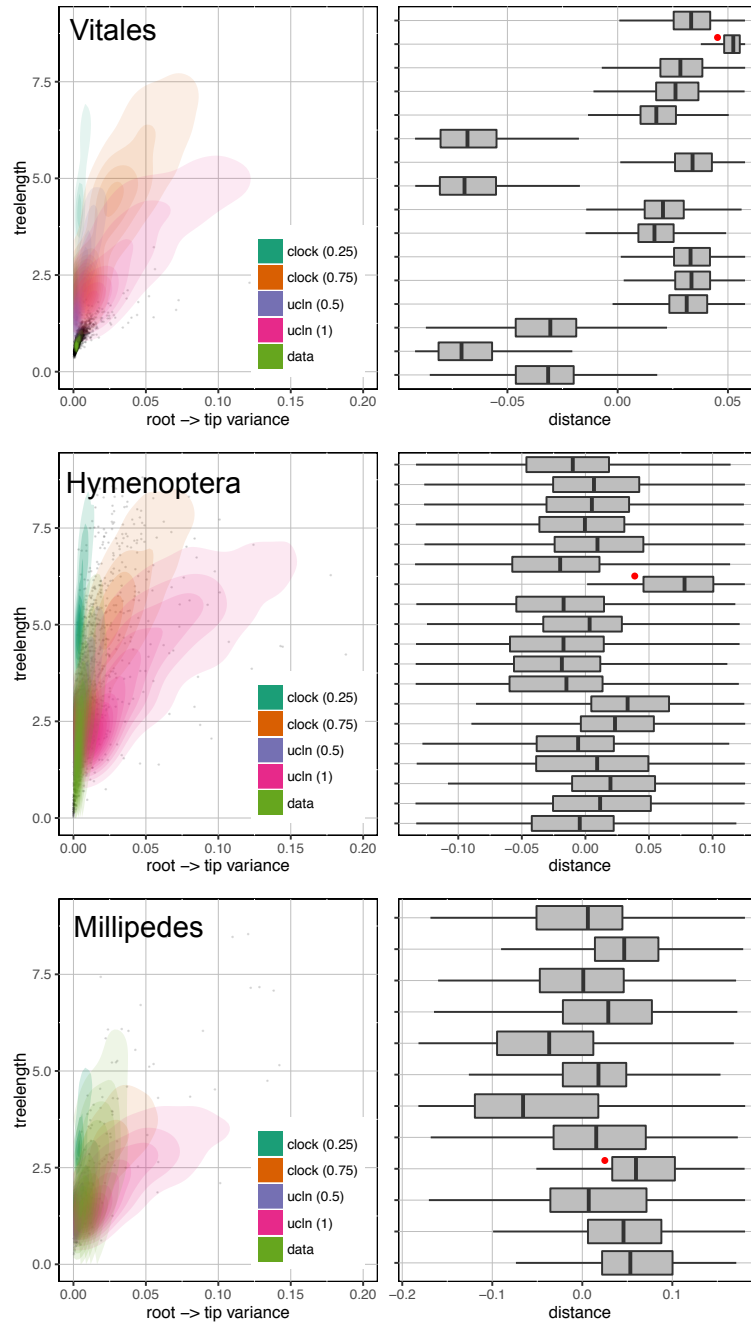

Figure 3: Plots of gene tree properties (left, including root-to-tip variance and treelength for simulated and empirical datasets) and tip-specific root-to-tip variance for empirical datasets (right). When the outgroup is present, the taxa are labeled with a red dot.

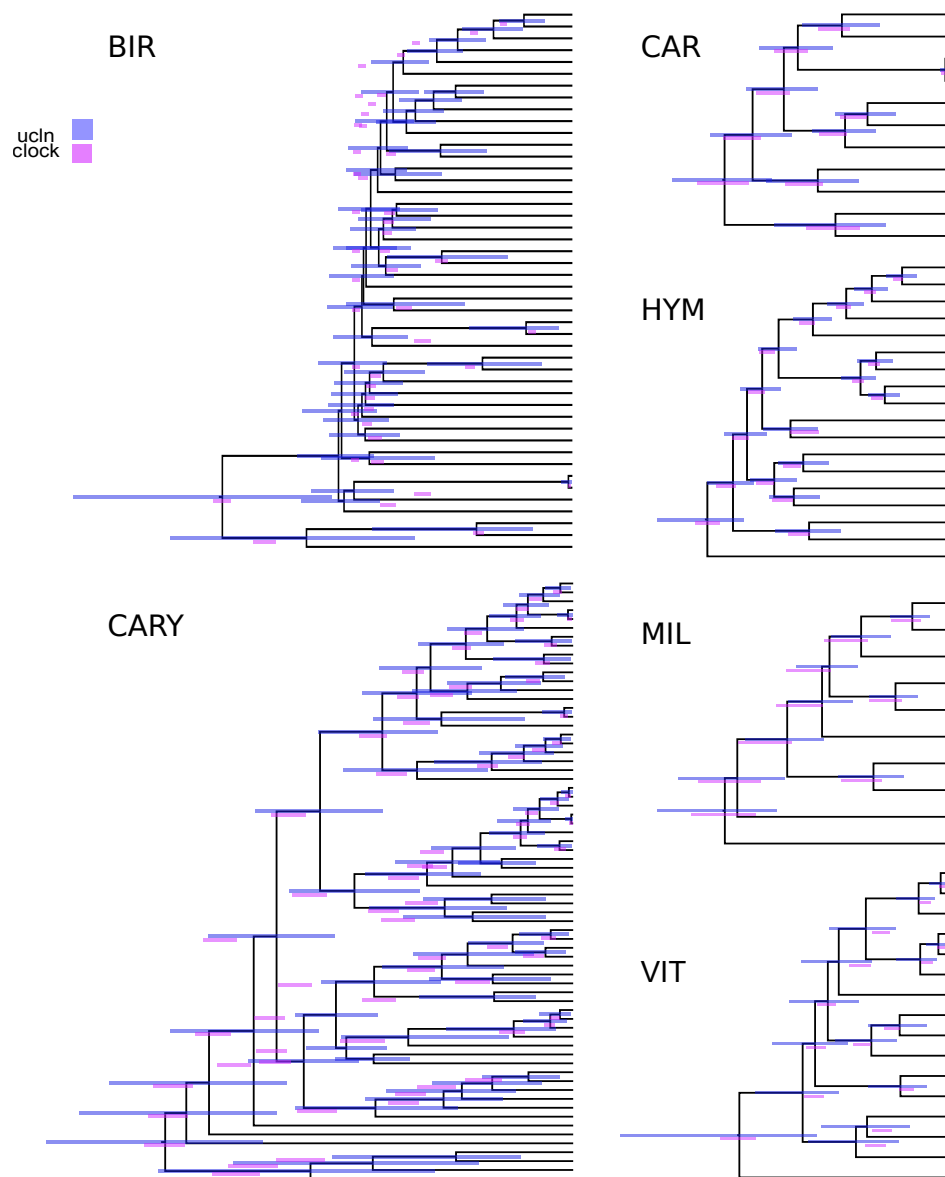

Figure 4: A comparison of strict clock and UCLN estimates of node ages for the six curated empirical datasets.

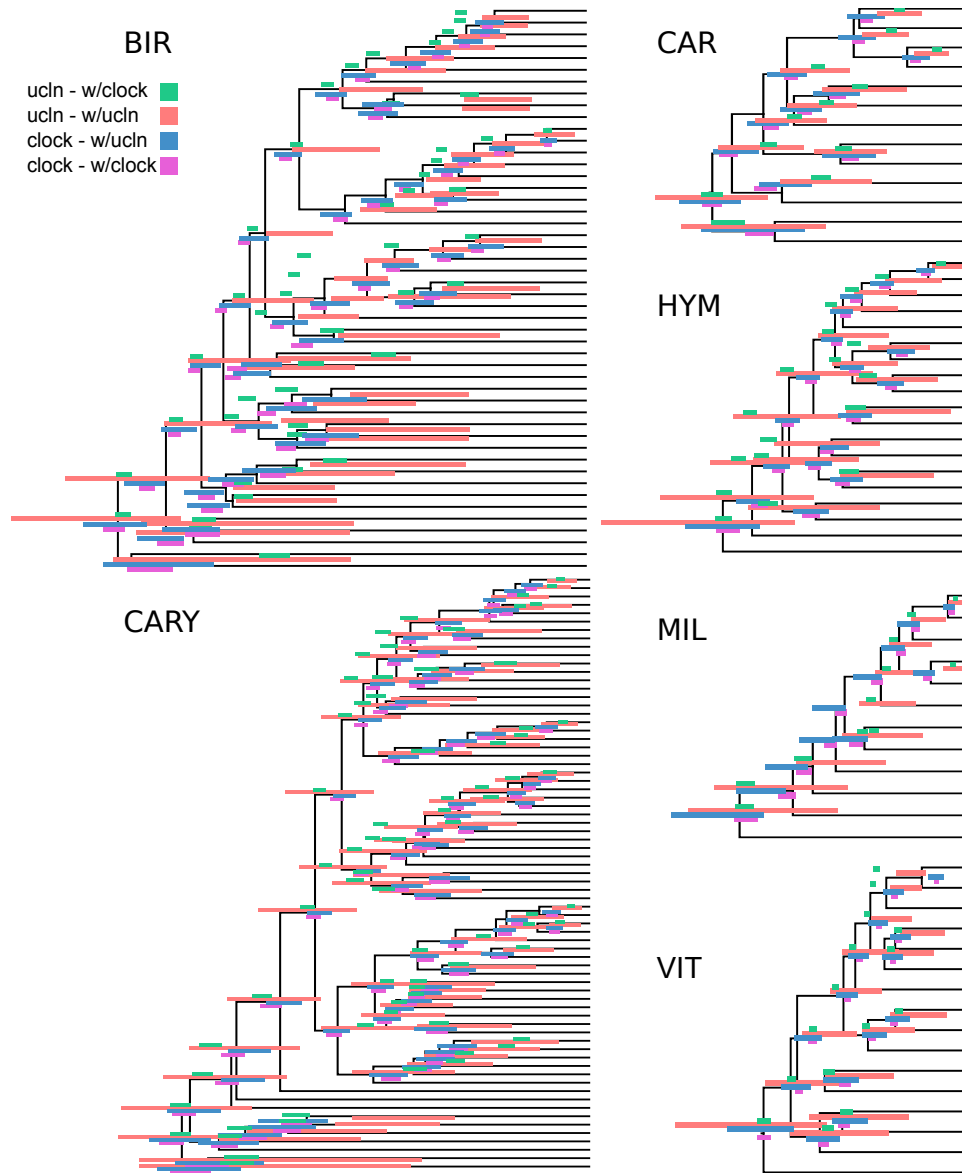

Figure 5: A comparison of strict clock and UCLN estimates of node ages for the simulated *clock* and *ucln* datasets. Red and pink are scenarios where the generating and inference are identical, while green and blue are where the models are mismatched.
